# Supplementary material for: Cosmogenic 21 Ne exposure ages on late Pleistocene moraines in Lassen Volcanic National Park, California, USA
Source: Copernicus journal article supplement (doi:10.5194/gchron-6-639-2024), 2024-12-06
Supplement: Supplementary file 1 [file gchron-6-639-2024-supplement.zip]

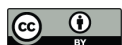

*Supplement of*

## **Cosmogenic $^{21}\text{Ne}$ exposure ages on late Pleistocene moraines in Lassen Volcanic National Park, California, USA**

**Joseph P. Tulenko et al.**

*Correspondence to:* Joseph P. Tulenko (jtulenko@bgc.org)

- gchron-6-639-2024-supplement-title-page.pdf
- Tulenko\_0624\_SupplementTable\_S1.xlsx

The copyright of individual parts of the supplement might differ from the article licence.
