# Supplementary material for: Cosmogenic 21 Ne exposure ages on late Pleistocene moraines in Lassen Volcanic National Park, California, USA
Source: Copernicus journal article supplement (doi:10.5194/gchron-6-639-2024), 2024-12-06
Supplement: Supplementary file 1 [file gchron-6-639-2024-supplement.zip]

## Sheet: Sheet1
Table S1. Step-degassing Ne isotope measurements for samples from Lassen area moraine boulders. Measured on BGC "Ohio" system, June 2023. Note: "n.d" = not detected.
			Heating	Heating																Excess 21Ne				Excess 21Ne as	Percent of total	Total
		Aliquot	temperature	time	Total 20Ne released1			Total 21Ne released2			Total 22Ne released3			21Ne / 20Ne4			22Ne / 20Ne4			This heating step				% of 21Ne released	excess 21Ne	excess 21Ne
Sample name	Aliquot	weight (g)	(deg C)	(hr)	(109 atoms)			(106 atoms)			(106 atoms)			(10-3)			(10-3)			(106 atoms g-1)				in this heating step	released in this step	(106 atoms g-1)
CRONUS-A	202306c	0.05528	950	0.25	0.887677	+/-	0.0438857	21.0521	+/-	1.1778	112.357	+/-	6.2887	23.184	+/-	0.339	126.6	+/-	2.6	333.311	+/-	21.4351		87.5232	98.3905	338.763	+/-	21.4587
			1200	0.2	0.0512267	+/-	0.00912048	0.452984	+/-	0.0486426	4.35047	+/-	2.16155	8.649	+/-	1.637	84.8	+/-	42.2	5.45232	+/-	1.00629		66.5375	1.60948
CRONUS-A	202306d	0.07775	950	0.25	1.43768	+/-	0.0698745	30.151	+/-	1.62551	175.829	+/-	9.21349	20.472	+/-	0.225	122.1	+/-	1.7	333.079	+/-	21.0754		85.8907	97.2137	342.626	+/-	21.111
			1200	0.2	0.100093	+/-	0.00980739	1.03843	+/-	0.0908626	11.1256	+/-	2.06532	10.129	+/-	1.089	111	+/-	20.9	9.54668	+/-	1.22681		71.4785	2.78633
CRONUS-A	202306e	0.06954	950	0.25	1.25607	+/-	0.0559855	25.9468	+/-	1.26053	154.087	+/-	7.22774	20.316	+/-	0.365	123	+/-	2.5	319.674	+/-	18.2826		85.6757	97.7482	327.038	+/-	18.3248
			1200	0.2	0.134322	+/-	0.0108415	0.90956	+/-	0.0802553	13.0633	+/-	2.29924	6.631	+/-	0.658	97.6	+/-	17.1	7.36413	+/-	1.24287		56.3021	2.25177
22-LAS-01	a	0.49897	950	0.25	0.520418	+/-	0.0198623	2.15488	+/-	0.111179	55.9543	+/-	2.73575	4.07	+/-	0.163	107.3	+/-	4	1.23246	+/-	0.252035		28.538	100	1.23246	+/-	0.252035
			1200	0.2	0.272598	+/-	0.0113969	0.849467	+/-	0.0556593	28.5519	+/-	2.0594	3.02	+/-	0.208	103.9	+/-	7.6		n.d.			-	-
22-LAS-02	b	0.4131	950	0.25	0.355004	+/-	0.0188956	1.67731	+/-	0.108714	37.2916	+/-	2.65444	4.611	+/-	0.197	104.9	+/-	5.5	1.51743	+/-	0.295933		37.3724	100	1.51743	+/-	0.295933
			1200	0.2	0.113892	+/-	0.00984783	0.388204	+/-	0.0442439	10.6542	+/-	2.05092	3.338	+/-	0.405	93.5	+/-	17.7		n.d.			-	-
22-LAS-08	a	0.4085	950	0.25	0.390076	+/-	0.020402	1.61163	+/-	0.110351	39.8481	+/-	2.77801	4.034	+/-	0.189	102	+/-	5.1	1.11969	+/-	0.307918		28.3809	100	1.11969	+/-	0.307918
			1200	0.2	0.152934	+/-	0.0123963	0.518138	+/-	0.0515352	15.8603	+/-	2.16169	3.313	+/-	0.349	103.7	+/-	14.1		n.d.			-	-
	b	0.42397	950	0.25	0.321863	+/-	0.012535	1.33054	+/-	0.067898	31.8585	+/-	2.14009	4.028	+/-	0.219	98.4	+/-	6.6	0.891922	+/-	0.182486		28.4207	100	0.891922	+/-	0.182486
			1200	0.2	0.246051	+/-	0.00949434	0.843793	+/-	0.0561637	24.6759	+/-	1.97509	3.306	+/-	0.243	99.3	+/-	8.2		n.d.			-	-
22-LAS-09	a	0.53004	950	0.25	0.404156	+/-	0.0164988	1.73045	+/-	0.101039	42.4709	+/-	2.36099	4.196	+/-	0.209	104.7	+/-	4.9	1.00852	+/-	0.211711		30.8911	100	1.00852	+/-	0.211711
			1200	0.2	0.296484	+/-	0.0127591	0.969428	+/-	0.0657685	30.1417	+/-	2.04672	3.158	+/-	0.227	100.8	+/-	7		n.d.			-	-
22-LAS-10	b	0.4875	950	0.25	0.945383	+/-	0.045731	3.15638	+/-	0.188582	98.8309	+/-	5.29443	3.261	+/-	0.092	104.4	+/-	2	0.736401	+/-	0.476118		11.3736	100	0.736401	+/-	0.476118
			1200	0.2	0.533186	+/-	0.0266718	1.54048	+/-	0.0959686	56.6613	+/-	3.40626	2.814	+/-	0.108	106.5	+/-	3.6		n.d.			-	-
22-LAS-11	a	0.4462	950	0.25	0.636049	+/-	0.031251	2.40571	+/-	0.15074	64.1981	+/-	3.65698	3.696	+/-	0.129	100.8	+/-	2.8	1.17356	+/-	0.396332		21.7666	100	1.17356	+/-	0.396332
			1200	0.2	0.427398	+/-	0.0215035	1.40727	+/-	0.0992469	44.4016	+/-	2.91124	3.207	+/-	0.16	104.1	+/-	4.4		n.d.			-	-
	b	0.42823	950	0.25	1.02459	+/-	0.0281751	3.70018	+/-	0.112233	104.382	+/-	3.03029	3.511	+/-	0.088	101.2	+/-	2.3	1.56086	+/-	0.326483		18.0642	100	1.56086	+/-	0.326483
			1200	0.2	0.392191	+/-	0.0102601	1.12476	+/-	0.0589954	42.0561	+/-	1.94044	2.76	+/-	0.153	106.3	+/-	5		n.d.			-	-
22-LAS-12	a	0.38038	950	0.25	0.371223	+/-	0.0193345	1.58801	+/-	0.0979617	39.8614	+/-	2.65528	4.178	+/-	0.174	107.7	+/-	5.1	1.28703	+/-	0.298239		30.8286	100	1.28703	+/-	0.298239
			1200	0.2	0.35714	+/-	0.0184973	0.989539	+/-	0.0763174	34.7244	+/-	2.59867	2.713	+/-	0.168	97.6	+/-	5.6		n.d.			-	-
	b	0.40625	950	0.25	0.413515	+/-	0.0131457	1.80594	+/-	0.0842346	43.0554	+/-	2.50279	4.271	+/-	0.169	104.1	+/-	5.2	1.43347	+/-	0.228387		32.2462	-	1.43347	+/-	0.228387
			(no second heating step)
22-LAS-16	a	0.29518	950	0.25	0.209885	+/-	0.0122026	1.13755	+/-	0.0827066	22.5802	+/-	2.12732	5.321	+/-	0.345	108	+/-	9.3	1.7498	+/-	0.305728		45.4049	100	1.7498	+/-	0.305728
			1200	0.2	0.0900387	+/-	0.00989117	0.22546	+/-	0.0407283	8.23003	+/-	2.10187	2.458	+/-	0.48	91.7	+/-	23.7		n.d.			-	-
22-LAS-17	a	0.46473	950	0.25	0.666934	+/-	0.0323281	2.52525	+/-	0.154931	69.7091	+/-	3.95866	3.698	+/-	0.136	104.9	+/-	3	1.18734	+/-	0.391803		21.851	100	1.18734	+/-	0.391803
			1200	0.2	0.0599253	+/-	0.00976227	0.205759	+/-	0.0390491	5.92495	+/-	2.06059	3.367	+/-	0.793	99.3	+/-	35.6		n.d.			-	-
22-LAS-18	a	0.39919	950	0.25	0.475927	+/-	0.023557	1.85811	+/-	0.118415	49.1964	+/-	3.11658	3.817	+/-	0.16	103.7	+/-	4.2	1.12688	+/-	0.344217		24.2095	100	1.12688	+/-	0.344217
			1200	0.2	0.296122	+/-	0.0148653	0.926122	+/-	0.0697222	30.4344	+/-	2.35477	3.059	+/-	0.191	103.2	+/-	6.7		n.d.			-	-
22-LAS-19	a	0.49331	950	0.25	0.542287	+/-	0.0261313	2.27343	+/-	0.13439	56.4474	+/-	3.35725	4.1	+/-	0.139	104.5	+/-	3.5	1.35574	+/-	0.314298		29.4181	100	1.35574	+/-	0.314298
			1200	0.2	0.436938	+/-	0.0203168	1.40567	+/-	0.0926953	44.0658	+/-	2.68435	3.153	+/-	0.154	101.2	+/-	4.4		n.d.			-	-
22-LAS-20	a	0.27568	950	0.25	0.664598	+/-	0.0318509	2.44923	+/-	0.145221	68.0145	+/-	3.92096	3.605	+/-	0.12	102.7	+/-	3.1	1.75087	+/-	0.627985		19.7075	100	1.75087	+/-	0.627985
			1200	0.2	0.275032	+/-	0.014566	0.85542	+/-	0.0622364	28.6553	+/-	2.33056	3.055	+/-	0.198	104.6	+/-	7.6		n.d.			-	-
22-LAS-22	a	0.44166	950	0.25	0.241128	+/-	0.0136639	1.3262	+/-	0.0937719	24.9045	+/-	2.11389	5.39	+/-	0.341	103.6	+/-	8.1	1.38728	+/-	0.231212		46.2	100	1.38728	+/-	0.231212
			1200	0.2	0.116792	+/-	0.00997005	0.414469	+/-	0.0441531	11.4485	+/-	2.02819	3.478	+/-	0.413	98.3	+/-	17.5		n.d.			-	-
22-LAS-23	a	0.26375	950	0.25	0.292376	+/-	0.0148822	1.16292	+/-	0.0790204	31.2697	+/-	2.29818	3.895	+/-	0.218	107.3	+/-	6.7	1.12902	+/-	0.342985		25.6061	100	1.12902	+/-	0.342985
			1200	0.2	0.138996	+/-	0.0103896	0.440855	+/-	0.0449279	14.8374	+/-	2.12986	3.105	+/-	0.329	107	+/-	15.3		n.d.			-	-
22-LAS-24	a	0.47113	950	0.25	2.16801	+/-	0.0910267	6.90205	+/-	0.339055	224.382	+/-	9.87904	3.118	+/-	0.053	103.8	+/-	0.9	1.03347	+/-	0.919111		7.05444	100	1.03347	+/-	0.919111
			1200	0.2	0.171597	+/-	0.0115869	0.486927	+/-	0.0496583	16.4507	+/-	2.12151	2.78	+/-	0.28	96	+/-	12		n.d.			-	-
22-LAS-5H3	a	0.45673	950	0.25	1.33698	+/-	0.0565323	4.0221	+/-	0.20702	136.602	+/-	6.30159	2.946	+/-	0.07	102.5	+/-	1.7		n.d.			-	-		n.d.
			1200	0.2	0.641412	+/-	0.0292664	1.92252	+/-	0.117556	65.5629	+/-	3.55116	2.934	+/-	0.116	102.4	+/-	3.3		n.d.			-	-
1 Computed by comparison to 20Ne signal in air pipettes. 1-sigma uncertainty includes measurement uncertainty of 20Ne signal in this analysis and the reproducibility of the air pipette signal
2 Computed by comparison to 21Ne signal in air pipettes. 1-sigma uncertainty includes measurement uncertainty of 21Ne signal in this analysis and the reproducibility of the air pipette signal
3 Computed by comparison to 22Ne signal in air pipettes. 1-sigma uncertainty includes measurement uncertainty of 21Ne signal in this analysis and the reproducibility of the air pipette signal
4 Isotope ratio measured internally during each analysis and corrected for mass discrimination when necessary based on an air standard.
